# Supplementary material
Source: Research Square preprint supplement (doi:10.21203/rs.3.rs-8822281/v1)
Supplement: Supplementary file 1 [file 2c326ccadb591f3de89848b1.docx]

**APPENDIX**

1. **Appendix Experience 1**

**Appendix 1. 1. Neutral words**

| FRENCH | ENGLISH |
| --- | --- |
| armoire | cabinet |
| ballon | ball |
| boîte | box |
| bonnet | cap |
| brosse | brush |
| cahier | notebook |
| camion | truck |
| chaise | chair |
| chapeau | hat |
| cravate | tie |
| crayon | pencil |
| échelle | ladder |
| écrou | nut |
| gomme | gum |
| marteau | hammer |
| mètre | metre |
| montre | watch |
| panier | basket |
| pelle | shovel |
| pince | pliers |
| pinceau | brush |
| prune | plum |
| robinet | tap |
| serrure | lock |
| sifflet | whistle |
| stylo | pen |
| tasse | cup |
| timbre | stamp |
| tonneau | barrel |
| verre | glass |

**Appendix 1. 2. Pictures**

**Pictures of the familiarization phase**

Picture without intruder letter

OOOOOOOOOOOOOOOOOOOOOOOOOOOOOOOOOOOOOOOOOOOOOOOO

OOOOOOOOOOOOOOOOOOOOOOOOOOOOOOOOOOOOOOOOOOOOOOOO

OOOOOOOOOOOOOOOOOOOOOOOOOOOOOOOOOOOOOOOOOOOOOOOO

OOOOOOOOOOOOOOOOOOOOOOOOOOOOOOOOOOOOOOOOOOOOOOOO

Picture with the intruder letter Q on the left

OOOOOOOOOOOOOOOOOOOOOOOOOOOOOOOOOOOOOOOOOOOOOOOO

OOOOOQOOOOOOOOOOOOOOOOOOOOOOOOOOOOOOOOOOOOOOOOOO

OOOOOOOOOOOOOOOOOOOOOOOOOOOOOOOOOOOOOOOOOOOOOOOO

OOOOOOOOOOOOOOOOOOOOOOOOOOOOOOOOOOOOOOOOOOOOOOOO

Picture with the intruder letter Q on the middle

OOOOOOOOOOOOOOOOOOOOOOOOOOOOOOOOOOOOOOOOOOOOOOOO

OOOOOOOOOOOOOOOOOOOOOOOOOOOOOOOOOOOOOOOOOOOOOOOO

OOOOOOOOOOOOOOOOOOOOOOOQOOOOOOOOOOOOOOOOOOOOOOOO

OOOOOOOOOOOOOOOOOOOOOOOOOOOOOOOOOOOOOOOOOOOOOOOO

Picture with the intruder letter Q on the right

OOOOOOOOOOOOOOOOOOOOOOOOOOOOOOOOOOOOOOOOOOOOOOOO

OOOOOOOOOOOOOOOOOOOOOOOOOOOOOOOOOOOOOOOOOOQOOOOO

OOOOOOOOOOOOOOOOOOOOOOOOOOOOOOOOOOOOOOOOOOOOOOOO

OOOOOOOOOOOOOOOOOOOOOOOOOOOOOOOOOOOOOOOOOOOOOOOO

**Pictures of the experimental phase**

Picture without intruder letter

FFFFFFFFFFFFFFFFFFFFFFFFFFFFFFFFFFFFFFFFFFFFFFFF

FFFFFFFFFFFFFFFFFFFFFFFFFFFFFFFFFFFFFFFFFFFFFFFF

FFFFFFFFFFFFFFFFFFFFFFFFFFFFFFFFFFFFFFFFFFFFFFFF

FFFFFFFFFFFFFFFFFFFFFFFFFFFFFFFFFFFFFFFFFFFFFFFF

Picture with the intruder letter E on the left

FFFFFFFFFFFFFFFFFFFFFFFFFFFFFFFFFFFFFFFFFFFFFFFF

FFFFFEFFFFFFFFFFFFFFFFFFFFFFFFFFFFFFFFFFFFFFFFFF

FFFFFFFFFFFFFFFFFFFFFFFFFFFFFFFFFFFFFFFFFFFFFFFF

FFFFFFFFFFFFFFFFFFFFFFFFFFFFFFFFFFFFFFFFFFFFFFFF

Picture with the intruder letter Q on the middle

FFFFFFFFFFFFFFFFFFFFFFFFFFFFFFFFFFFFFFFFFFFFFFFF

FFFFFFFFFFFFFFFFFFFFFFFFFFFFFFFFFFFFFFFFFFFFFFFF

FFFFFFFFFFFFFFFFFFFFFFFEFFFFFFFFFFFFFFFFFFFFFFFF

FFFFFFFFFFFFFFFFFFFFFFFFFFFFFFFFFFFFFFFFFFFFFFFF

Picture with the intruder letter E on the right

FFFFFFFFFFFFFFFFFFFFFFFFFFFFFFFFFFFFFFFFFFFFFFFF

FFFFFFFFFFFFFFFFFFFFFFFFFFFFFFFFFFFFFFFFFFEFFFFF

FFFFFFFFFFFFFFFFFFFFFFFFFFFFFFFFFFFFFFFFFFFFFFFF

FFFFFFFFFFFFFFFFFFFFFFFFFFFFFFFFFFFFFFFFFFFFFFFF

**Appendix 1. 3. Response times**

**Results**

Figure. Average response times depending on whether the intruder is present or not and according to the context: sequence of letters, non-degraded background, degraded background

**Statistics**

| ANOVA |  |  |  |  |  |
| --- | --- | --- | --- | --- | --- |
|  | F | df | p | η²p | BF10 |
| Intruder (2305 VS 1845) | 54.21 | 1-23 | .001 | 0.70 | 102324.994 |
| Context (2087 VS 2107 VS 2029) | 3.19 | 2-46 | .05 | 0.12 | 0.64 |
| Interaction | 1.91 | 2-46 | .15 | 0.07 | 0.45 |

| *Paired Samples T-Test* | | | | | | |
| --- | --- | --- | --- | --- | --- | --- |
| Measure 1 | Measure 2 | t | df | p | η²p | BF10 |
| AB_ND (2309) | AB_No(2259) | 0.791 | 28 | .435 | 0.02 | 0.263 |
| AB_ND (2309) | AB_D(2345) | 0.377 | 27 | .709 | 0.005 | 0.214 |
| AB_No(2259) | AB_D(2345) | 1.212 | 28 | .235 | 0.04 | 0.384 |
| PR_ND (1905) | PR_No(1916) | 0.080 | 26 | .937 | 0.0002 | 0.204 |
| PR_ND (1905) | PR_D(1715) | 2.407 | 25 | .024 | 0.18 | 2.295 |
| PR_No(1916) | PR_D(1715) | 1.522 | 24 | .141 | 0.08 | 0.583 |

1. **Appendix Experience 2**

**Material**

| **Status** | **Prime** | **Target** | **Translation** |
| --- | --- | --- | --- |
| word | piNcEaU | pinceau | brush |
| word | mAnTeAu | manteau | coat |
| word | cOlLe | colle | glue |
| word | mOntRe | montre | watch |
| word | pEiGnE | peigne | comb |
| word | prUnE | prune | plum |
| word | cOrDe | corde | rope |
| word | tiMbRe | timbre | stamp |
| word | fLeUr | fleur | flower |
| word | siFfLeT | sifflet | whistle |
| word | pAniEr | panier | basket |
| word | bRoSsE | brosse | brush |
| word | cHaPeAU | chapeau | hat |
| word | gOmMe | gomme | eraser |
| word | bOnNeT | bonnet | bonnet |
| word | cHaiSe | chaise | chair |
| word | xoxoxoxo | gilet | waistcoat |
| word | xoxoxoxo | marteau | hammer |
| word | xoxoxoxo | pince | pliers |
| word | xoxoxoxo | carton | cardboard |
| word | xoxoxoxo | robinet | tap |
| word | xoxoxoxo | tonneau | barrel |
| word | xoxoxoxo | caisse | crate |
| word | xoxoxoxo | mètre | meter |
| word | xoxoxoxo | crayon | pencil |
| word | xoxoxoxo | verre | glass |
| word | xoxoxoxo | gants | gloves |
| word | xoxoxoxo | camion | lorry |
| word | xoxoxoxo | gourde | water bottle |
| word | xoxoxoxo | boîte | box |
| word | xoxoxoxo | pêche | peach |
| word | xoxoxoxo | pelle | shovel |
| word | cabine | cabine | cabin |
| word | feuille | feuille | leaf |
| word | cheveux | cheveux | hair |
| word | brique | brique | brick |
| word | armoire | armoire | cupboard |
| word | moufle | moufle | mittens |
| word | cahier | cahier | notebook |
| word | écrou | écrou | nut |
| word | tiroir | tiroir | drawer |
| word | garage | garage | garage |
| word | porte | porte | door |
| word | tasse | tasse | cup |
| word | cravate | cravate | tie |
| word | stylo | stylo | pen |
| word | cloche | cloche | bell |
| word | échelle | échelle | ladder |
| irregular non-word | vRnOk | vrnok |  |
| irregular non-word | gNtRa | gntra |  |
| irregular non-word | pSnEK | psnek |  |
| irregular non-word | gNviO | gnvio |  |
| irregular non-word | vRkeD | vrked |  |
| irregular non-word | dRpLo | drplo |  |
| irregular non-word | rJXaP | rjxap |  |
| irregular non-word | mVLuR | mvlur |  |
| irregular non-word | xoxoxoxo | xnkju |  |
| irregular non-word | xoxoxoxo | zdrufo |  |
| irregular non-word | xoxoxoxo | plmusi |  |
| irregular non-word | xoxoxoxo | jutplx |  |
| irregular non-word | xoxoxoxo | vbqoro |  |
| irregular non-word | xoxoxoxo | dskeju |  |
| irregular non-word | xoxoxoxo | vnupji |  |
| irregular non-word | xoxoxoxo | fqvono |  |
| irregular non-word | xnkjup | xnkjup |  |
| irregular non-word | wqvule | wqvule |  |
| irregular non-word | lqthea | lqthea |  |
| irregular non-word | tlvurn | tlvurn |  |
| irregular non-word | trmaps | trmaps |  |
| irregular non-word | drgueko | drgueko |  |
| irregular non-word | plxetvu | plxetvu |  |
| irregular non-word | sknoatp | sknoatp |  |
| regular non-word | mOuPe | moupe |  |
| regular non-word | tiNkA | tinka |  |
| regular non-word | nAiNo | naino |  |
| regular non-word | lUCha | lucha |  |
| regular non-word | riNsi | rinsi |  |
| regular non-word | oNcHa | oncha |  |
| regular non-word | sOnTi | sonti |  |
| regular non-word | mEiSa | meisa |  |
| regular non-word | xoxoxoxo | niono |  |
| regular non-word | xoxoxoxo | lousti |  |
| regular non-word | xoxoxoxo | tompti |  |
| regular non-word | xoxoxoxo | tamnep |  |
| regular non-word | xoxoxoxo | deurmi |  |
| regular non-word | xoxoxoxo | tailau |  |
| regular non-word | xoxoxoxo | saitme |  |
| regular non-word | xoxoxoxo | nionic |  |
| regular non-word | lomsin | lomsin |  |
| regular non-word | majnir | majnir |  |
| regular non-word | rompso | rompso |  |
| regular non-word | pinchi | pinchi |  |
| regular non-word | memsen | memsen |  |
| regular non-word | doubynt | doubynt |  |
| regular non-word | nansnen | nansnen |  |
| regular non-word | bionffa | bionffa |  |
